# Supplementary material for: Status and influential factors of soil nutrients and acidification in Chinese tea plantations: a meta-analysis
Source: Copernicus journal article supplement (doi:10.5194/soil-11-175-2025), 2025-02-06
Supplement: Supplementary file 1 [file soil-11-175-2025-supplement.pdf]

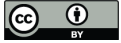

*Supplement of*

## **Status and influential factors of soil nutrients and acidification in Chinese tea plantations: a meta-analysis**

**Dan Wang et al.**

*Correspondence to:* Wanqin Yang (scyangwq@163.com)

The copyright of individual parts of the supplement might differ from the article licence.

**Table S1. A brief comparison of Chinese and international soil classification systems (Shi et al., 2004; Gerasimova, 2010; Wang et al., 2020)**

| Feature                     | Chinese soil classification system                                                     | American soil classification system                                                                                      | WRB (World Reference Base) soil classification system                                                                                                                       |
|-----------------------------|----------------------------------------------------------------------------------------|--------------------------------------------------------------------------------------------------------------------------|-----------------------------------------------------------------------------------------------------------------------------------------------------------------------------|
| Classification Principles   | Based on the geographical distribution, genesis, and soil properties                   | Based on diagnostic horizons and properties, emphasizing soil temperature, moisture, and other classification indicators | Based on modern soil classification concepts, including Soil Taxonomy, the legend for the FAO Soil Map of the World 1988, the Référentiel Pédologique, and Russian concepts |
| Classification Hierarchy    | Includes levels such as soil classes and soil types                                    | Includes orders, suborders, great groups, subgroups, families, and series                                                | Includes two levels: Reference Soil Groups and qualifiers                                                                                                                   |
| Naming Basis                | Considers the genesis and characteristics of the soil                                  | Based on soil properties and clear criteria for classification units                                                     | Combines diagnostic criteria and soil characteristics                                                                                                                       |
| International Applicability | Focuses on soil types and distributions specific to China                              | Used as the primary or secondary classification by more than 80 countries worldwide                                      | Aimed at providing a unified classification and naming standard for global soil types                                                                                       |
| Scientific Basis            | Combines China's soil science research achievements and field survey data              | Developed by the U.S. Department of Agriculture (USDA) with the participation of more than 1,500 pedologists worldwide   | Based on the work carried out by FAO, ISRIC World Soils, and the Universities of Leuven and Wageningen                                                                      |
| Updates and Revisions       | Regularly revised to reflect developments in scientific research and survey techniques | Regularly updated, with the latest version being the 12th edition in 2014                                                | Regularly updated, with the latest version being the 4th edition in 2014                                                                                                    |
| International Cooperation   | Mainly based on the research achievements of Chinese experts                           | Accepted by many countries, especially in Latin America and Asia                                                         | Coordinated by IUSS, it is the result of international cooperation                                                                                                          |

## Reference

- Shi, X., Yu, D., Sun, W., Wang, H., Zhao, Q., Gong, Z.: Comparative Study on the Reference Benchmark of Soil Classification Systems between China and the United States: The Correlation between Soil Classes and Soil Orders in the US System. *Chinese Sci. Bull.* 49(13), 1299-1303. doi: 10.1360/csb2004-49-13-1299. 2004.
- Gerasimova, M.I.: Chinese soil taxonomy: between the American and the international classification systems. *Eurasian Soil Sci.* 43, 945-949. doi: 10.1134/S1064229310080120. 2010.
- Wang, L., Chen, J., Wang, S., Wang, T., Tan, H.: Logic expression and retrieval of Soil Taxonomy based on Pedon. *Acta Pedologica Sinica* 57(6), 1378-1386. doi: 10.11766/trxb201904090429. 2020.
